# Supplementary material for: The Epidemiology of Hospital-Treated Alopecia Areata in Denmark, 1995–2016
Source: Springer Nature journal article supplement (doi:10.1007/s13555-024-01145-9), 2024-04-01
Supplement: MOESM1 [file 26985206]

## SUPPLEMENTARY MATERIAL

### The Epidemiology of Hospital-Treated Alopecia Areata in Denmark, 1995-2016

Sissel Brandt Toft Sørensen,<sup>1</sup> Prethibha George,<sup>2</sup> Oladayo Jagun,<sup>2</sup> Robert Wolk<sup>3</sup>, Lynne Napatalung<sup>2,4</sup>, Samuel H. Zwillich<sup>3</sup>, Lars Iversen,<sup>5,6</sup> Vera Ehrenstein<sup>1</sup>

<sup>1</sup>Department of Clinical Medicine and Department of Clinical Epidemiology, Aarhus University and Aarhus University Hospital, Aarhus N, Denmark

<sup>2</sup>Pfizer Inc., New York, NY, USA

<sup>3</sup>Pfizer Inc, Groton, CT, USA

<sup>4</sup>Department of Dermatology, Icahn School of Medicine at Mount Sinai, New York, NY, USA

<sup>5</sup>Department of Dermatology, Aarhus University Hospital and Aarhus University, Aarhus N, Denmark

<sup>6</sup>MC2 Therapeutics A/S, Hørsholm, Denmark

Corresponding author: Prof Vera Ehrenstein, Department of Clinical Medicine and Department of Clinical Epidemiology, Aarhus University and Aarhus University Hospital, Olof Palmes Allé 43-45 8200 Aarhus N, Denmark; Tel: +45 87 16 88 97, E-mail: ve@clin.au.dk

**Table S1.** ICD-10 Codes to Identify Hospital-Treated AA

| Description                  | ICD-10 | Severity Subtype* |           |        |
|------------------------------|--------|-------------------|-----------|--------|
|                              |        | AT/AU             | Non-AT/AU | All AA |
| Alopecia areata              | L63    |                   | x         | x      |
| Alopecia (capitis) totalis   | L63.0  | x                 |           | x      |
| Alopecia universalis         | L63.1  | x                 |           | x      |
| Ophiasis                     | L63.2  |                   | x         | x      |
| Other alopecia areata        | L63.8  |                   | x         | x      |
| Alopecia areata, unspecified | L63.9  |                   | x         | x      |

\*For patients falling in more than one severity subtype based on the first-recorded ICD-10 codes recorded on the AA cohort entry date, patients were classified as AT/AU if they had the respective code. Otherwise they were classified as non-AT/AU to create mutually exclusive all-inclusive categories. AA, alopecia areata; AT, alopecia totalis; AU, alopecia universalis.
